# Supplementary material for: Development of an evidence-based diagnostic algorithm for infection in patients with transcutaneous osseointegration following amputation
Source: Copernicus journal article supplement (doi:10.5194/jbji-9-49-2024), 2024-02-06
Supplement: Supplementary file [file jbji-9-49-2024-supplement.pdf]

Supplement of J. Bone Joint Infect., 9, 49–57, 2024  
<https://doi.org/10.5194/jbji-9-49-2024-supplement>  
© Author(s) 2024. CC BY 4.0 License.

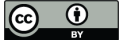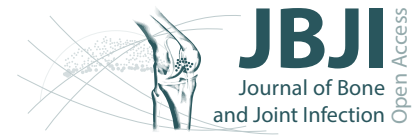

*Supplement of*

## **Development of an evidence-based diagnostic algorithm for infection in patients with transcutaneous osseointegration following amputation**

**Shafaf Hasin Alam et al.**

*Correspondence to:* Jason S. Hoellwarth (drjsoon@gmail.com)

The copyright of individual parts of the supplement might differ from the article licence.

Table S1 - List of entire bacteria culture results, correlated preoperative with postoperative.

| Episode | Any Intraoperative Culture Different from Preoperative Swab | Negative Preoperative Swab, Positive Surgery | Pre1                            | Intra1                          | Pre2                | Intra2                          | Pre3                  | Intra3                     | Intra4 |
|---------|-------------------------------------------------------------|----------------------------------------------|---------------------------------|---------------------------------|---------------------|---------------------------------|-----------------------|----------------------------|--------|
| 1       | 1                                                           | 1                                            | -                               | Staphylococcus aureus (MRSA)    |                     |                                 |                       |                            |        |
| 2       | 1                                                           |                                              | Group G Streptococcus           | Bacillus circulans              |                     |                                 |                       |                            |        |
| 3       |                                                             |                                              | Staphylococcus epidermidis      | Staphylococcus epidermidis      |                     |                                 |                       |                            |        |
| 4       |                                                             |                                              | Staphylococcus aureus           | Staphylococcus aureus           |                     |                                 |                       |                            |        |
| 5       | 1                                                           | 1                                            | -                               | Morganella morganii             |                     |                                 |                       |                            |        |
| 6       |                                                             |                                              | Staphylococcus aureus           | Staphylococcus aureus           |                     |                                 |                       |                            |        |
| 7       | 1                                                           | 1                                            | -                               | Staphylococcus aureus           |                     | Streptococcus intermedius (SAG) |                       | Staphylococcus epidermidis |        |
| 8       | 1                                                           | 1                                            | -                               | Enterococcus faecalis           |                     |                                 |                       |                            |        |
| 9       | 1                                                           |                                              | Streptococcus intermedius (SAG) | Streptococcus intermedius (SAG) |                     | Escherichia coli                |                       |                            |        |
| 10      | 1                                                           |                                              | Streptococcus intermedius (SAG) | Streptococcus intermedius (SAG) |                     | Escherichia coli                |                       |                            |        |
| 11      |                                                             |                                              | -                               | *                               |                     |                                 |                       |                            |        |
| 12      |                                                             |                                              | Group B Streptococcus           | Group B Streptococcus           |                     |                                 |                       |                            |        |
| 13      | 1                                                           | 1                                            | -                               | Group B Streptococcus           |                     | Bacteroides fragilis            |                       |                            |        |
| 14      | 1                                                           | 1                                            | -                               | Staphylococcus aureus           |                     |                                 |                       |                            |        |
| 15      |                                                             |                                              | Enterobacter cloacae            | Enterobacter cloacae            |                     |                                 |                       |                            |        |
| 16      |                                                             |                                              | Serratia marcescens             | Serratia marcescens             | Morganella morganii | Morganella morganii             | Enterococcus faecalis | Enterococcus faecalis      |        |

|    |   |   |                              |                              |                             |                               |  |                                    |                         |
|----|---|---|------------------------------|------------------------------|-----------------------------|-------------------------------|--|------------------------------------|-------------------------|
| 17 |   |   | Staphylococcus aureus        | Staphylococcus aureus        |                             |                               |  |                                    |                         |
| 18 |   |   | -                            | *                            |                             |                               |  |                                    |                         |
| 19 | 1 |   | Staphylococcus aureus        | Staphylococcus aureus        |                             | Streptococcus agalactiae      |  |                                    |                         |
| 20 | 1 | 1 | -                            | Staphylococcus aureus        |                             | Serratia marcescens           |  | Pseudomonas aeruginosa             |                         |
| 21 |   |   | -                            | *                            |                             |                               |  |                                    |                         |
| 22 |   |   | Group B Streptococcus        | Group B Streptococcus        |                             |                               |  |                                    |                         |
| 23 | 1 | 1 | -                            | Escherichia coli             |                             | Streptococcus anginosus (SAG) |  | Pasteurella canis                  |                         |
| 24 | 1 | 1 | -                            | Staphylococcus aureus        |                             |                               |  |                                    |                         |
| 25 | 1 |   | Gram positive cocci          | Staphylococcus epidermidis   |                             |                               |  |                                    |                         |
| 26 | 1 |   | Staphylococcus epidermidis   | Staphylococcus epidermidis   |                             | Morganella morganii           |  |                                    |                         |
| 27 |   |   | Pseudomonas aeruginosa       | Pseudomonas aeruginosa       |                             |                               |  |                                    |                         |
| 28 | 1 |   | Group G Streptococcus        | Pseudomonas aeruginosa       | Proteus mirabilis           | Proteus vulgaris              |  | Bacteroides fragilis               |                         |
| 29 | 1 | 1 | -                            | Staphylococcus epidermidis   |                             |                               |  |                                    |                         |
| 30 |   |   | -                            | *                            |                             |                               |  |                                    |                         |
| 31 |   |   | Staphylococcus aureus        | Serratia marcescens          |                             |                               |  |                                    |                         |
| 32 | 1 |   | Staphylococcus aureus        | Serratia marcescens          |                             | Pseudomonas aeruginosa        |  | Streptococcus agalactiae (Group B) | Streptococcus anginosus |
| 33 | 1 |   | Staphylococcus aureus        | Staphylococcus aureus        |                             | Pseudomonas aeruginosa        |  |                                    |                         |
| 34 | 1 |   | Staphylococcus aureus        | Staphylococcus aureus        |                             | Enterococcus faecalis         |  |                                    |                         |
| 35 |   |   | Staphylococcus aureus (MRSA) | Staphylococcus aureus (MRSA) |                             |                               |  |                                    |                         |
| 36 | 1 |   | Escherichia coli             | Escherichia coli             | Streptococcus milleri (SAG) | Streptococcus milleri (SAG)   |  | Pseudomonas aeruginosa             |                         |

|    |   |   |                              |                              |                        |                                    |                       |                                  |  |
|----|---|---|------------------------------|------------------------------|------------------------|------------------------------------|-----------------------|----------------------------------|--|
| 37 | 1 |   | Streptococcus milleri (SAG)  | Streptococcus milleri (SAG)  |                        | Streptococcus constellatus (SAG)   |                       |                                  |  |
| 38 | 1 | 1 | -                            | Escherichia coli             |                        | Klebsiella pneumoniae              |                       | Streptococcus constellatus (SAG) |  |
| 39 | 1 | 1 | -                            | Eikenella corrodens          |                        | Bacteroides species                |                       |                                  |  |
| 40 | 1 |   | Streptococcus species (SAG)  | Propionibacterium acnes      |                        |                                    |                       |                                  |  |
| 41 |   |   | Staphylococcus aureus (MRSA) | Staphylococcus aureus (MRSA) |                        | Enterobacter cloacae               |                       |                                  |  |
| 42 |   |   | Enterobacter cloacae         | Enterobacter cloacae         |                        |                                    |                       |                                  |  |
| 43 | 1 |   | Staphylococcus aureus        | Klebsiella oxytoca           |                        |                                    |                       |                                  |  |
| 44 | 1 |   | Pseudomonas                  | Pseudomonas aeruginosa       | Streptococcus pyogenes | Streptococcus anginosus (SAG)      |                       |                                  |  |
| 45 | 1 |   | Escherichia coli             | Escherichia coli             | Enterococcus faecalis  | Enterococcus faecalis              |                       | Pseudomonas                      |  |
| 46 | 1 | 1 | -                            | Staphylococcus aureus        |                        |                                    |                       |                                  |  |
| 47 | 1 |   | Staphylococcus aureus        | Staphylococcus aureus        | Escherichia coli       | Escherichia coli                   |                       | Klebsiella pneumoniae            |  |
| 48 |   |   | Escherichia coli             | Escherichia coli             |                        |                                    |                       |                                  |  |
| 49 |   |   | Streptococcus milleri (SAG)  | Streptococcus milleri (SAG)  |                        |                                    |                       |                                  |  |
| 50 | 1 | 1 | -                            | Actinotignum schaalii        |                        |                                    |                       |                                  |  |
| 51 |   |   | Staphylococcus aureus        | Staphylococcus aureus        |                        |                                    |                       |                                  |  |
| 52 |   |   | Staphylococcus aureus        | Enterococcus faecalis        | Pseudomonas aeruginosa | Pseudomonas aeruginosa             | Aeromonas             |                                  |  |
| 53 |   |   | Pseudomonas aeruginosa       | Pseudomonas aeruginosa       | Enterococcus faecalis  |                                    |                       |                                  |  |
| 54 |   |   | Proteus mirabilis            | Proteus mirabilis            | Escherichia coli       |                                    |                       |                                  |  |
| 55 | 1 |   | Escherichia coli             | Enterococcus faecium         | Acinetobacter          | Stenotrophomonas maltophilia       | Klebsiella pneumoniae |                                  |  |
| 56 | 1 |   | Pseudomonas aeruginosa       | Proteus mirabilis            |                        | Streptococcus agalactiae (Group B) |                       |                                  |  |

|    |  |  |                  |                  |  |  |  |  |
|----|--|--|------------------|------------------|--|--|--|--|
| 57 |  |  | Escherichia coli | Escherichia coli |  |  |  |  |
|----|--|--|------------------|------------------|--|--|--|--|

This table identifies all the bacteria identified by culture swabs.

\*These four patients did not have the original operative culture result data available to determine the specific bacteria; however, they had postoperative follow-up notes stating the operative culture was positive. Therefore, they could be certain to have positive intraoperative bacterial cultures, even if the specific species could not be determined retrospectively.

Table S2 - success of preoperative swab correctly identifying intraoperative cultures

| Preoperative Swab               | Intraoperative Culture          | 0=Negative Intraoperative<br>1=Correct<br>2=Gram Correct<br>3=Gram Wrong<br>4=Preoperative Negative |
|---------------------------------|---------------------------------|-----------------------------------------------------------------------------------------------------|
| Aeromonas                       |                                 | 0                                                                                                   |
| Klebsiella pneumonia            |                                 | 0                                                                                                   |
| Enterobacter cloacae            | Enterobacter cloacae            | 1                                                                                                   |
| Enterobacter cloacae            | Enterobacter cloacae            | 1                                                                                                   |
| Morganella morganii             | Morganella morganii             | 1                                                                                                   |
| Proteus mirabilis               | Proteus mirabilis               | 1                                                                                                   |
| Serratia marcescens             | Serratia marcescens             | 1                                                                                                   |
| Acinetobacter                   | Stenotrophomonas maltophilia    | 2                                                                                                   |
| Proteus mirabilis               | Proteus vulgaris                | 2                                                                                                   |
| Enterococcus faecalis           |                                 | 0                                                                                                   |
| Enterococcus faecalis           | Enterococcus faecalis           | 1                                                                                                   |
| Enterococcus faecalis           | Enterococcus faecalis           | 1                                                                                                   |
| Staphylococcus epidermidis      | Staphylococcus epidermidis      | 1                                                                                                   |
| Staphylococcus epidermidis      | Staphylococcus epidermidis      | 1                                                                                                   |
| Gram positive cocci             | Staphylococcus epidermidis      | 2                                                                                                   |
| Escherichia coli                |                                 | 0                                                                                                   |
| Escherichia coli                | Escherichia coli                | 1                                                                                                   |
| Escherichia coli                | Escherichia coli                | 1                                                                                                   |
| Escherichia coli                | Escherichia coli                | 1                                                                                                   |
| Escherichia coli                | Escherichia coli                | 1                                                                                                   |
| Escherichia coli                | Escherichia coli                | 1                                                                                                   |
| Escherichia coli                | Enterococcus faecium            | 3                                                                                                   |
| Group B Streptococcus           | Group B Streptococcus           | 1                                                                                                   |
| Group B Streptococcus           | Group B Streptococcus           | 1                                                                                                   |
| Streptococcus intermedius (SAG) | Streptococcus ontermedius (SAG) | 1                                                                                                   |
| Streptococcus intermedius (SAG) | Streptococcus ontermedius (SAG) | 1                                                                                                   |
| Streptococcus milleri (SAG)     | Streptococcus milleri (SAG)     | 1                                                                                                   |
| Streptococcus milleri (SAG)     | Streptococcus milleri (SAG)     | 1                                                                                                   |
| Streptococcus milleri (SAG)     | Streptococcus milleri (SAG)     | 1                                                                                                   |
| Group G Streptococcus           | Bacillus circulans              | 2                                                                                                   |
| Streptococcus species (SAG)     | Propionibacterium acnes         | 2                                                                                                   |
| Streptococcus pyogenes          | Streptococcus anginosus (SAG)   | 2                                                                                                   |
| Group G Streptococcus           | Pseudomonas aeruginosa          | 3                                                                                                   |

|                              |                              |   |
|------------------------------|------------------------------|---|
| Pseudomonas                  | Pseudomonas aeruginosa       | 1 |
| Pseudomonas aeruginosa       | Pseudomonas aeruginosa       | 1 |
| Pseudomonas aeruginosa       | Pseudomonas aeruginosa       | 1 |
| Pseudomonas aeruginosa       | Pseudomonas aeruginosa       | 1 |
| Pseudomonas aeruginosa       | Proteus mirabilis            | 2 |
| Staphylococcus aureus        | Staphylococcus aureus        | 1 |
| Staphylococcus aureus        | Staphylococcus aureus        | 1 |
| Staphylococcus aureus        | Staphylococcus aureus        | 1 |
| Staphylococcus aureus        | Staphylococcus aureus        | 1 |
| Staphylococcus aureus        | Staphylococcus aureus        | 1 |
| Staphylococcus aureus        | Staphylococcus aureus        | 1 |
| Staphylococcus aureus        | Staphylococcus aureus        | 1 |
| Staphylococcus aureus        | Staphylococcus aureus        | 1 |
| Staphylococcus aureus (MRSA) | Staphylococcus aureus (MRSA) | 1 |
| Staphylococcus aureus        | Enterococcus faecalis        | 2 |
| Staphylococcus aureus        | Klebsiella oxytoca           | 3 |
| Staphylococcus aureus        | Serratia marcescens          | 3 |
| Staphylococcus aureus        | Serratia marcescens          | 3 |
| Staphylococcus aureus (MRSA) | Staphylococcus aureus (MRSA) | 1 |
|                              | Bacteroides                  | 4 |
|                              | Bacteroides fragilis         | 4 |
|                              | Bacteroides fragilis         | 4 |
|                              | Eikenella corrodens          | 4 |
|                              | Enterobacter cloacae         | 4 |
|                              | Klebsiella pneumoniae        | 4 |
|                              | Klebsiella pneumoniae        | 4 |
|                              | Morganella morganii          | 4 |
|                              | Morganella morganii          | 4 |
|                              | Pasteurella canis            | 4 |
|                              | Serratia marcescens          | 4 |
|                              | Actinotignum schaalii        | 4 |
|                              | Enterococcus faecalis        | 4 |
|                              | Enterococcus faecalis        | 4 |
|                              | Staphylococcus epidermidis   | 4 |
|                              | Staphylococcus epidermidis   | 4 |
|                              | Escherichia coli             | 4 |
|                              | Escherichia coli             | 4 |
|                              | Escherichia coli             | 4 |
|                              | Escherichia coli             | 4 |

|  |                                  |   |
|--|----------------------------------|---|
|  | Group B Streptococcus            | 4 |
|  | Streptococcus agalactiae         | 4 |
|  | Streptococcus agalactiae         | 4 |
|  | Streptococcus agalactiae         | 4 |
|  | Streptococcus anginosus (SAG)    | 4 |
|  | Streptococcus anginosus (SAG)    | 4 |
|  | Streptococcus constellatus (SAG) | 4 |
|  | Streptococcus constellatus (SAG) | 4 |
|  | Streptococcus intermedius (SAG)  | 4 |
|  | Pseudomonas                      | 4 |
|  | Pseudomonas aeruginosa           | 4 |
|  | Pseudomonas aeruginosa           | 4 |
|  | Pseudomonas aeruginosa           | 4 |
|  | Pseudomonas aeruginosa           | 4 |
|  | Pseudomonas aeruginosa           | 4 |
|  | Staphylococcus aureus            | 4 |
|  | Staphylococcus aureus            | 4 |
|  | Staphylococcus aureus            | 4 |
|  | Staphylococcus aureus            | 4 |
|  | Staphylococcus aureus            | 4 |
|  | Staphylococcus aureus (MRSA)     | 4 |

This table compares the bacteria cultured from the preoperative swab versus the bacteria that was grown from deep operative cultures. Color highlighting of the first two columns is provided to aid in understanding the bacterial types: red=other gram negative, orange=other gram positive, yellow=Escherichia coli, green=streptococcus species, blue=pseudomonas species, magenta=staphylococcus aureus. The third column identifies the correctness of preoperative swab with intraoperative culture; the text color coding is intended to estimate the potential degree of concern of any mismatch; black (0)=swab culture without operative culture isolated, green (1)=matched swab and operative culture, orange (2)=incorrect cultured species but correct gram status, magenta (3)=incorrect culture and incorrect gram status, red (4)=undetected on preoperative swab
